1 **Title: Supplier-origin gut microbiomes affect host body weight and select autism-related**  
2 **behaviors**

3

4 McAdams, Zachary L.<sup>1,2,3</sup>; Gustafson, Kevin L.<sup>2,3,4, 5</sup>; Russell, Amber L.<sup>5</sup>; Self, Rachel<sup>6</sup>; Petry,  
5 Amy L.<sup>6</sup>; Lever, Teresa E.<sup>7,8</sup>; Ericsson, Aaron, C.<sup>1,2,3,4,5</sup>

6

7 <sup>1</sup> Molecular Pathogenesis & Therapeutics Program, University of Missouri, Columbia, MO,  
8 65201

9 <sup>2</sup> MU Metagenomics Center, University of Missouri, Columbia, MO, 65201

10 <sup>3</sup> Mutant Mouse Resource and Research Center at MU, Columbia, MO, 65201

11 <sup>4</sup> Comparative Medicine Program, University of Missouri, Columbia, MO, 65201

12 <sup>5</sup> Department of Veterinary Pathobiology, University of Missouri, Columbia, MO, 65201

13 <sup>6</sup> Division of Animal Sciences, University of Missouri, Columbia, MO 65211

14 <sup>7</sup> Department of Otolaryngology, School of Medicine, University of Missouri, Columbia, MO  
15 65212

16 <sup>8</sup> Department of Biomedical Sciences, University of Missouri, Columbia, MO 65211

17

18 **Corresponding Author: ACE ([ericssona@missouri.edu](mailto:ericssona@missouri.edu))**

19 **Word Count: 5583**

20

21 **ORCID**

22 ZM: <https://orcid.org/0000-0003-2883-507X>

23 KG: <https://orcid.org/0000-0002-2104-8762>

24 AR: <https://orcid.org/0000-0003-1291-5374>

25 AP: <https://orcid.org/0000-0003-2145-2199>

26 TL: <https://orcid.org/0000-0002-5587-3816>

27 AE: <https://orcid.org/0000-0002-3053-7269>

28

29 **Abstract**

30 Autism spectrum disorders (ASD) are complex human neurodiversities increasing in  
31 prevalence within the human population. In search of therapeutics to improve quality-of-life for  
32 ASD patients, the gut microbiome (GM) has become a promising target as a growing body of  
33 work supports roles for the complex community of microorganisms in influencing host behavior  
34 via the gut-brain-axis. However, whether naturally-occurring microbial diversity within the host  
35 GM affects these behaviors is often overlooked. Here we applied a model of population-level  
36 differences in the GM to a classic ASD model – the BTBR T<sup>+</sup> Itpr3<sup>fl</sup>/J mouse – to assess how  
37 complex GMs affect host behavior. Leveraging the naturally occurring differences between  
38 supplier-origin GMs, our data demonstrate that differing, complex GMs selectively effect host  
39 ASD-related behavior – especially neonatal ultrasonic communication – and reveal a male-  
40 specific effect on behavior not typically observed in this strain. We then identified that the body  
41 weight of BTBR mice is influenced by the postnatal GM which was potentially mediated by  
42 microbiome-dependent effects on energy harvest in the gut. These data provide insight into how  
43 variability within the GM affects host behavior and growth, thereby emphasizing the need to  
44 incorporate naturally occurring diversity within the host GM as an experimental factor in  
45 biomedical research.

46

47 **Keywords:** BTBR, ASD, Microbiome, Gut-Brain-Axis, Growth, Supplier-origin GM, Envigo, The  
48 Jackson Laboratory

49

## 50 Introduction

51 Autism spectrum disorders (ASD) are a collection of complex human neurodiversities  
52 characterized by reduced social communication and increased restrictive, repetitive  
53 behaviors<sup>1,2</sup>. The prevalence of ASD has risen to 1-in-36 children, with males being diagnosed  
54 at nearly four times the rate of females (4.3% vs 1.1%, respectively)<sup>2</sup>. In addition to the core  
55 ASD behaviors, many co-occurring conditions including anxiety, depression, and  
56 gastrointestinal disorders are frequently diagnosed in ASD patients<sup>1,3</sup>. The diversity of ASD  
57 behaviors and co-occurring conditions is attributed to the complicated and relatively unknown  
58 etiology of ASD as genetics, the environment, and interactions between the two factors  
59 influence both the incidence and severity of the neurodiversity<sup>1</sup>. Given the presence of  
60 gastrointestinal disorders in ASD patients and increasing evidence for microbiome-mediated  
61 effects on host behavior via the gut-brain-axis<sup>4</sup>, the gut microbiome (GM) has become a  
62 promising therapeutic target to improve quality-of-life for ASD patients.

63 The GM is the complex community of microorganisms colonizing the gastrointestinal  
64 tract, functioning in host metabolism, vitamin and short chain fatty acid production, and the  
65 synthesis of neuroactive compounds. Growing evidence supports crucial roles for the GM in  
66 modulating many host behaviors, including ASD-related behaviors<sup>5,6</sup>. For example, germ-free  
67 mice exhibit the core ASD-related behaviors (i.e., a lack of social preference and increased  
68 repetitive behaviors) which are reversed by repopulating the gut with complex microbial  
69 communities or even single, psychobiotic microbes (e.g., *Lactobacillus reuteri*)<sup>7,8</sup>. The use of  
70 ASD-specific mouse models also supports microbiome-mediated mechanisms in which  
71 microbial metabolites or modulation of host immune response affects host sociability,  
72 communication, and stereotypic behavior<sup>5,9,10</sup>. While much of this work has focused on  
73 therapeutic roles for individual psychobiotic microorganisms or microbial metabolites, few have

74 acknowledged how complex, naturally occurring differences in the composition of the GM  
75 influence ASD-related behaviors.

76 The naturally-occurring differences in GM communities between commercial rodent  
77 producers can be leveraged as a model of population-level differences in microbiome. The large  
78 differences in microbial diversity between GMs originating from The Jackson Laboratory and  
79 Envigo, in particular, are associated with robust effects on multiple host phenotypes in CD-1  
80 mice including anxiety-related behavior, feeding behaviors, *in utero* growth, and adult body  
81 weight<sup>11–13</sup>. In addition to behavior and growth, supplier-origin GMs have also been found to  
82 differentially affect host immunity and disease susceptibility<sup>14–16</sup>. Interestingly, other groups have  
83 found that comparable supplier-origin communities affect the ASD-related behaviors of the  
84 maternal immune activation (MIA) mouse model of ASD<sup>9,17</sup>. Maternal T helper type 17 (Th17)  
85 immune responses in pregnant mice with a Taconic-, but not Jackson Laboratory-origin  
86 microbiome produce offspring exhibiting greater ASD-related behaviors<sup>9</sup>. The application of  
87 these distinct supplier-origin communities in the MIA model of ASD provided a unique platform  
88 to identify a single bacterial taxon sufficient to induce maternal Th17 responses and ASD-  
89 related behavior in the offspring<sup>9,18</sup>.

90 Here we utilized a similar discovery-based microbiome model to determine whether  
91 supplier-origin GMs originating from The Jackson Laboratory or Envigo affect the ASD-related  
92 behavior and growth of the BTBR T<sup>+</sup> *Itpr3<sup>fl</sup>*/J (BTBR) mouse. The BTBR mouse exhibits robust  
93 ASD-related behaviors including altered ultrasonic vocalizations (USVs), increased repetitive  
94 behaviors, and a lack of social preference<sup>19–23</sup>. Interestingly, this model also demonstrates  
95 altered gut physiology and GM composition, thus increasing its utility in investigating the role of  
96 the GM in ASD-related behaviors<sup>24,25</sup>. Our approach leveraged BTBR mice colonized with The  
97 Jackson Laboratory- and Envigo-origin GMs. Using a robust panel of neonatal and adult ASD-  
98 related behavioral testing approaches, we identified selective supplier-origin GM-dependent  
99 effects on host ASD-related behavior – especially neonatal ultrasonic communication. We also

100 found that the body weight of BTBR mice is influenced by the postnatal GM and that this effect  
101 may be mediated by microbiome-dependent effects on feed conversion in the gut.

102

## 103 **Results**

### 104 *Supplier-origin microbiomes selectively affect ASD-related behavior*

105 We characterized the ASD-related behavior of BTBR mice colonized with two supplier-  
106 origin GMs (**Figure 1A**). Relatively speaking, the GM originating from The Jackson Laboratory  
107 was less rich than the GM representative of Envigo ( $p_{GM} < 0.001$ , **Figure 1B**), thus, these  
108 communities were referred to as GM<sub>Low</sub> and GM<sub>High</sub>, respectively. Sex-dependent effects on  
109 richness were also observed ( $p_{Sex} = 0.002$ ). While these communities did not differ in alpha  
110 diversity ( $p_{GM} = 0.867$ , **Figure 1C**), significant differences in both beta diversity ( $p_{GM} < 0.001$ ,  
111 **Figure 1D**) and taxonomic composition (**Figure S1**) were observed. Using ALDEX2<sup>26</sup>, sixty-one  
112 genera (37%) were identified as differentially abundant between the two communities, including  
113 an uncultured *Peptococcaceae* genus and *Anaeroplasma* from the phylum *Bacillota* enriched in  
114 GM<sub>Low</sub> and *Mucispirillum* (phylum *Deferribacterota*) and *Bilophila* (phylum *Desulfobacterota*)  
115 enriched in GM<sub>High</sub> (**Supplementary File 1**). Differentially abundant taxa were confirmed using  
116 ANCOM-BC2<sup>27</sup> (**Supplementary File 1**).

117 We first assessed ultrasonic vocalizations (USVs) in neonatal BTBR mice ( $n = 10-12$   
118 mice/sex/GM). A significant, albeit subtle, GM-dependent effect ( $p_{GM} = 0.038$ ) on USV rate was  
119 observed with GM<sub>Low</sub> BTBR mice exhibiting a greater USV rate than GM<sub>High</sub> mice (**Figure 1E**).  
120 While a significant sex-dependent effect ( $p_{Sex} = 0.006$ ) on USV rate was also observed, Tukey  
121 *post-hoc* testing revealed an interesting interaction of sex and GM within GM<sub>High</sub> mice where  
122 males exhibited a greater USV rate than females ( $p = 0.011$ ), suggesting greater ASD-related  
123 behavior in this group. This sex-dependent difference was not observed in GM<sub>Low</sub> mice.  
124 Significant GM- ( $p_{GM} < 0.001$ ) and sex-dependent effects ( $p_{Sex} = 0.044$ ) on the overall USV  
125 repertoire were observed (**Figure 1F**). Specifically, significant sex-dependent effects on the

126 relative abundance of “complex” and “step down” calls were observed, whereas the relative  
127 abundance of “up frequency modulation” calls differed by both sex and GM (**Figure 1G**,  
128 **Supplementary File 2**).

129 In separate cohorts of adult BTBR mice ( $n = 20/\text{sex}/\text{GM}$ ) we then assessed repetitive  
130 and social behaviors. Using the self-grooming test (**Figure 1H**), we observed no GM-dependent  
131 effects ( $p_{\text{GM}} = 0.321$ ) on grooming behavior; however, a strong sex-dependent trend ( $p_{\text{Sex}} =$   
132  $0.069$ ) was observed, with males exhibiting greater grooming behavior than females.  
133 Conversely, female mice exhibited significantly greater ( $p_{\text{Sex}} = 0.048$ ) burying behavior than  
134 males (**Figure 1I**). No GM-dependent effects of burying behavior were observed ( $p_{\text{GM}} = 0.862$ ).  
135 Lastly, we assessed social behavior using the three-chamber social preference test. As  
136 expected of the BTBR model of ASD<sup>20</sup>, we observed no overall differences in time spent  
137 between the stranger and object chambers ( $p_{\text{Position}} = 0.685$ ). Additionally, neither GM ( $p_{\text{GM}} =$   
138  $0.892$ ) nor sex ( $p_{\text{Sex}} = 0.951$ ) affected time spent in either chamber of the social preference test  
139 overall; however, a *post hoc* analysis using paired T tests revealed a strong trend towards  
140 GM<sub>High</sub> males exhibiting greater asocial behavior ( $p = 0.061$ ), spending more time in the object  
141 zone relative to the stranger zone. Finally, we determined the social preference index (SPI =  
142  $[\text{time}_{\text{stranger}} - \text{time}_{\text{object}}] / [\text{time}_{\text{stranger}} + \text{time}_{\text{object}}]$ )<sup>28</sup> and found that BTBR mice with GM<sub>High</sub> exhibited  
143 significantly reduced sociability compared to mice with GM<sub>Low</sub> ( $p_{\text{GM}} = 0.044$ , **Figure 1K**).  
144 Collectively, these data suggest that standardized complex GMs selectively affect ASD-related  
145 behaviors of the BTBR mouse.

146 GM-, age-, and sex-matched C57BL/6J (B6) mice used as behavioral controls in our  
147 adult ASD-related behavior testing also exhibited select GM-dependent effects on ASD-related  
148 behavior. No GM-dependent effects on B6 grooming behavior were observed; however, GM<sub>High</sub>  
149 B6 mice exhibited significantly reduced burying activity relative to GM<sub>Low</sub> B6 mice (**Figure S2A-**  
150 **B**). B6 mice overall exhibited the social behavior expected of the strain, spending more time in

151 the stranger zone compared to the object zone; however, no GM-dependent effects on social  
152 behavior were observed (**Figure S2C-D**).

153

#### 154 *Standardized complex GMs postnatally affect body weight*

155 While assessing the effect of supplier-origin GMs on the ASD-related behavior of BTBR  
156 mice, we collected body weights as previous work by our group using comparable GMs in CD-1  
157 mice has revealed microbiome-dependent effects on body weight<sup>12,13</sup>. In the cohort of neonatal  
158 mice used for USV testing, we measured body weight at birth (D0) and after testing (D7). A total  
159 of 10 litters were weighed (5 GM<sub>Low</sub> and 5 GM<sub>High</sub>) at birth. Litters ranged from 5 to 12 pups (9.5  
160  $\pm$  2.3) with no GM-dependent effects on litter size ( $p_{GM} = 0.383$ , T test). Following the collection  
161 of birth weights, litters were culled to 8 mice with an equal representation of males and females  
162 when possible.

163 At birth, GM<sub>High</sub> BTBR mice were significantly heavier than GM<sub>Low</sub> mice ( $p_{GM} < 0.001$ ,  
164 **Figure 2A**). A similar GM-dependent effect on body weight was observed at D7 where GM<sub>High</sub>  
165 mice were again significantly heavier than GM<sub>Low</sub> BTBR mice ( $p_{GM} = 0.004$ ). In the cohorts of  
166 BTBR mice used for adult behavior testing, however, we observed that GM<sub>Low</sub> mice were  
167 heavier at weaning (D21,  $p_{GM} < 0.001$ , **Figure 2C**) and adulthood (D50,  $p_{GM} = 0.078$ , **Figure**  
168 **2D**). Interestingly, B6 mice colonized with GM<sub>Low</sub> also weighed more than those with GM<sub>High</sub> at  
169 weaning ( $p_{GM} < 0.001$ , **Figure S3A**) and adulthood ( $p_{GM} = 0.069$ , **Figure S3B**).

170 Given that BTBR mice born to a GM<sub>Low</sub> dam weighed less than pups born to a GM<sub>High</sub>  
171 dam at birth but were heavier in adulthood, we hypothesized that the postnatal GM influenced  
172 body weight. To confirm that the postnatal microbiome influenced body weight, we employed a  
173 cross-fostering experimental approach wherein mice born to GM<sub>Low</sub> or GM<sub>High</sub> dams were cross-  
174 fostered onto surrogate dams of the opposite GM within 48 hours of birth (**Figure S4A**)<sup>29</sup>. Mice  
175 born to a GM<sub>Low</sub> birth dam but cross-fostered to and raised on a GM<sub>High</sub> surrogate dam were  
176 referred to as CF<sub>High</sub> (meaning “cross-fostered” onto GM<sub>High</sub>) with the reciprocal group (i.e., born



177 to GM<sub>High</sub> but cross-fostered onto GM<sub>Low</sub>) being referred to as CF<sub>Low</sub> (meaning “cross-fostered”  
178 onto GM<sub>Low</sub>). If the observed GM-dependent effect on body weight was influenced by the  
179 prenatal (i.e., maternal) GM, then the phenotype would match that of the adult birth dam.  
180 Conversely, if this phenotype is influenced postnatally, then the phenotype would match that of  
181 the adult surrogate dam.

182 We confirmed that cross-fostering successfully transferred the GM from surrogate dam  
183 to cross-fostered mice using 16S rRNA sequencing of fecal samples collected at fifty days of  
184 age. Cross-fostered mice exhibited similar taxonomic composition to the surrogate dams  
185 (**Figure S5**). Additionally, alpha and beta diversity of these mice were characteristic of the  
186 fostered microbial communities, with CF<sub>Low</sub> mice exhibiting a less rich and compositionally  
187 distinct GM compared to CF<sub>High</sub> mice (**Figure S4B-D**). In cross-fostered BTBR mice, animals  
188 with CF<sub>Low</sub> were heavier than CF<sub>High</sub> at PND7 ( $p_{GM} = 0.006$ , **Figure 2E**). In separate cross-  
189 fostered cohorts, however, CF<sub>Low</sub> mice were heavier at weaning ( $p_{GM} < 0.001$ , **Figure 2F**) and  
190 adulthood ( $p_{GM} = 0.056$ , **Figure 2G**). Given that the GM-dependent effect on body weight was  
191 similar to the phenotype of the mature surrogate dam GM, these data support that these  
192 supplier-origin GMs postnatally affect body weight in BTBR mice.

193

#### 194 *Cross-fostering abrogates select effects on BTBR ASD-related behavior*

195 Previous reports have shown that the maternal *in utero* BTBR environment contributes  
196 to offspring ASD-related behavior of the model<sup>30,31</sup>, thus we sought to determine whether the  
197 selective GM-dependent effects on ASD-related behavior (**Figure 1E-K**) were programmed *in*  
198 *utero* by the maternal GM or influenced, like body weight, primarily by the postnatal GM. In  
199 neonatal mice (n = 10-13 mice/sex/GM), no significant differences in USV call rate or  
200 composition were observed between groups (**Figure S4E-F**); however, GM-dependent effects  
201 on the relative abundance of “step up”, “step down”, and “up frequency modulation” calls were  
202 observed (**Figure S4G, Supplementary File 3**). While adult (11-21 mice/sex/GM) grooming

203 behavior was not affected by GM ( $p_{GM} = 0.237$ , **Figure S4H**), CF<sub>Low</sub> mice exhibited greater  
204 repetitive burying activity than CF<sub>High</sub> BTBR mice ( $p_{GM} = 0.049$ , **Figure S4I**). Social behaviors did  
205 not differ between CF<sub>Low</sub> and CF<sub>High</sub> BTBR mice (**Figure S4J**). Collectively, the select GM-  
206 dependent effects of ASD-related behavior of BTBR mice were abrogated by cross-fostering,  
207 suggesting the ASD-related behaviors of BTBR mice may be influenced by factors from both the  
208 pre- (i.e., maternal) and postnatal GM.

209

### 210 *Supplier-origin GMs potentially affect nutrient acquisition in the BTBR mouse*

211 To explore potential mechanisms influencing the postnatal GM-dependent effect of body  
212 weight of BTBR mice, we assessed three facets of host energy balance: food intake, voluntary  
213 activity, and fecal energy loss. We first assessed food intake by measuring the relative food  
214 intake of standard maintenance chow (LabDiet #5053 Chow) in pair-housed mice ( $n = 12-16$   
215 mice/sex/GM,  $n = 6-8$  cages/sex/GM) for six weeks, beginning at weaning. As expected, BTBR  
216 mice with GM<sub>Low</sub> weighed more than those with GM<sub>High</sub> throughout the food intake experiment ( $p$   
217  $< 0.001$ , **Figure S6A**). Despite the difference in body weight, these groups consumed similar  
218 amounts of food over the six-week period (**Figure S6B**). Given that food intake positively  
219 correlated with body weight in both GMs (GM<sub>Low</sub>  $\rho = 0.67$ ,  $p < 0.001$ ; GM<sub>High</sub>  $\rho = 0.49$ ,  $p < 0.001$ ;  
220 **Figure S6C**), we determined feed efficiency by normalizing food intake at the cage level by the  
221 combined body weight of mice in the cage; however, no GM-dependent effects on feed  
222 efficiency were observed (**Figure 3A**). Interestingly, female mice exhibited a higher feed  
223 efficiency than males ( $p_{Sex} < 0.001$ ).

224 Turning to mechanisms of energy loss, we measured output using voluntary running  
225 wheel activity of individually housed mice for one week. No sex- or GM-dependent effects on  
226 total distance travelled were observed, suggesting no difference in physical activity levels  
227 between GM<sub>Low</sub> and GM<sub>High</sub> BTBR mice (**Figure 3B**). Lastly, we measured fecal energy loss  
228 using bomb calorimetry of fecal samples collected over the course of a two- to three-day period.

229 While no significant differences were observed, strong sex- ( $p = 0.093$ ) and GM-dependent ( $p =$   
230  $0.082$ ) trends on fecal energy were observed. GM<sub>High</sub> mice exhibited greater fecal energy  
231 content indicating reduced energy harvest in the gut. Collectively, these data suggest that  
232 effects of supplier-origin GMs on energy harvest from the diet may contribute to the postnatal  
233 GM-mediated effect on body weight.

234

## 235 **Discussion**

236 Our data demonstrate selective GM-dependent effects on the behavior and growth of the  
237 BTBR mouse model of ASD. Specifically, we observed GM-dependent effects on vocalization  
238 rate and call composition in neonatal mice and multiple strong trends in adults that collectively  
239 suggest an Envigo-origin microbiome (GM<sub>High</sub>) exacerbated the ASD-related behavior of male  
240 BTBR mice. While the overall effects on behavior were selective and largely subtle, we revealed  
241 that the mature postnatal GM influenced body weight, beginning at weaning and persisting into  
242 adulthood. Mature BTBR mice with a low richness, Jackson Laboratory-origin microbiome  
243 weighed more than those with an Envigo-origin GM. While no GM-dependent effects on food  
244 intake or voluntary activity were observed, our data indicate that the postnatal GM may affect  
245 body weight by modulating energy acquisition in the gut. Collectively, these data suggest that  
246 the BTBR mouse model of ASD is susceptible to GM-mediated effects on both behavior and  
247 metabolism.

248 Separation- or stress-induced USVs have long been used as a measure of neonatal  
249 ASD-related behavior; however, the translatability of this phenotype is difficult to interpret as  
250 both the vocalization rate and call repertoire are highly variable across mouse strains and  
251 models of ASD<sup>21,32</sup>. For example, vocalization rate is often increased in the BTBR and MIA ASD  
252 models but decreased in some transgenic models of ASD (e.g., *Cntnap2*<sup>-/-</sup>), yet both effects on  
253 vocalization rate are classically defined as an ASD-related behavior associated with

254 communication<sup>9,21,33</sup>. While the etiology of this behavior is unclear, our data demonstrate that  
255 variability in the literature regarding the USV phenotype may be influenced, in part, by the host  
256 GM. Whether these effects are due to microbiome-mediated influence on the neonatal stress  
257 response or even maternal care remains unknown; however, our data support that the  
258 communication ASD-related phenotype measured in neonatal BTBR mice is influenced by the  
259 GM.

260 Despite ASD being diagnosed more frequently in male patients, a similar sex-bias is not  
261 consistently observed across mouse models of the neurodiversity. Historically, the BTBR mouse  
262 presents strong ASD-related behaviors in both males and females, indicating the strain may not  
263 be a useful model of the ASD sex bias. Our behavior data suggest that the GM preferentially  
264 exacerbates male ASD-related behavior and that the typical Jackson Laboratory-origin GM may  
265 contribute to the lack of sex-dependent differences in the presentation of ASD-related  
266 behaviors. In the present study, BTBR mice with a Jackson Laboratory-origin GM (GM<sub>Low</sub>)  
267 exhibited no sex-dependent differences in ultrasonic communication, repetitive, or social  
268 behaviors; however, when colonized with an Envigo-origin GM (GM<sub>High</sub>), BTBR mice  
269 demonstrated male-specific increases in all three of the core ASD-related behaviors. Multiple  
270 genetic and hormonal mechanisms have been proposed to explain the strong male bias in ASD  
271 diagnoses<sup>34-36</sup>; however, the contribution of the GM to this sex bias in mouse models of ASD, let  
272 alone humans, is yet to be described.

273 The postnatal GM-mediated effects on body weight identified in this study were of  
274 particular interest. In CD-1 mice, we have historically found that animals with a Jackson-origin  
275 microbiome (GM<sub>Low</sub>) are heavier than those with an Envigo-origin (GM<sub>High</sub>), beginning *in utero*  
276 and persisting into adulthood<sup>12,13</sup>. The GM-dependent difference in body weight observed in CD-  
277 1 mice is likely due to an effect on overall growth, as these groups do not differ in relative body  
278 composition and GM<sub>Low</sub> CD-1 mice exhibit increased cardiac weight<sup>12</sup>. Rather than an *in utero*

279 programming of body weight – as in CD-1 mice – we found that the body weight of BTBR mice  
280 is postnatally influenced by the GM, as GM<sub>High</sub> BTBR mice were heavier at birth but weighed  
281 less than GM<sub>Low</sub> animals in adulthood (**Figure 2**). Fetal growth and neurodevelopment are  
282 influenced, in part, by the maternal microbiome modulating placental vascularization and  
283 nutrient availability to the fetus<sup>37,38</sup>, and given that the maternal BTBR *in utero* environment  
284 contributes to the development of ASD-related behavior<sup>31</sup>, it is reasonable to hypothesize that  
285 the maternal GM of BTBR mice may influence both the fetal growth and development of ASD-  
286 related behaviors in BTBR offspring.

287 Adult body weights exhibited the expected phenotype of their respective GM; mature  
288 BTBR mice with GM<sub>Low</sub> were heavier than those with GM<sub>High</sub>. Further supporting these GM-dependent  
289 effects on adult body weight, we observed similar GM-dependent effects in age- and sex-  
290 matched B6 mice (**Figure S3**). Whether the GM-dependent effect on body weight in either strain  
291 is due to differences in body size or composition remains unknown; however, it may be strain-  
292 specific as the BTBR mouse exhibits increased abdominal obesity and peripheral insulin  
293 resistance relative to B6 mice, both of which are factors that may be influenced by the host  
294 GM<sup>39–41</sup>.

295 Contrary to our conclusion that the postnatal GM influences body weight, we observed  
296 that – consistent with the body weight phenotype at birth – BTBR mice born to GM<sub>High</sub> dams  
297 were heavier than those born to GM<sub>Low</sub> dams at one week of age. This is likely due to the GM  
298 having not yet matured to the point at which the postnatal GM could influence body weight. The  
299 gastrointestinal tract of neonatal mice undergoes tremendous development during the first few  
300 weeks of life as the gut transitions from a highly aerobic to anaerobic environment and the host  
301 moves from maternal sources of nutrition to solid food<sup>42,43</sup>. Consistent with this idea, the  
302 neonatal GM at seven days of age is more similar to that of the oral microbiome of the dam than  
303 the fecal microbiome, including several aerobic bacterial taxa like *Lactobacillus* and

304 *Streptococcus* dominating the neonatal gastrointestinal tract of CD-1 mice<sup>44</sup>. The pup fecal  
305 microbiome does, however, become more similar in composition to the maternal fecal  
306 microbiome around three weeks of age<sup>44</sup>, the same age at which we observed postnatal GM-  
307 dependent effects on body weight in BTBR mice. Collectively, our body weight data suggest that  
308 the mature (post-weaning) postnatal GM affects the body weight of the BTBR mouse.

309         When identifying the mechanism by which the postnatal GM influenced body weight in  
310 BTBR mice, we observed no effects on food intake or voluntary activity; however, a strong trend  
311 towards a GM-dependent effect on energy harvest was identified (**Figure 3**). GM<sub>High</sub> BTBR mice  
312 excreted more fecal energy than GM<sub>Low</sub> mice, which is consistent with the hypothesis that this  
313 group extracted fewer calories from the diet, leading to the decreased weight relative to GM<sub>Low</sub>  
314 mice. Acknowledging that both the host and microbiome harvest energy from the diet<sup>45,46</sup>,  
315 multiple microbiome-mediated mechanisms may be working in concert to influence host body  
316 weight, including the alteration of host gene expression within the gut modulating nutrient  
317 availability and absorption<sup>47,48</sup>. Alternatively, the diverse members of these bacterial  
318 communities may have differing energy requirements for replication which may, in turn, affect  
319 energy availability to the host. Exploring these mechanisms may reveal novel microbiome-  
320 mediated mechanisms influencing feed conversion with profound metabolic and economic  
321 implications.

322         Collectively, our data have implications regarding both the specific use of the BTBR  
323 mouse in biomedical research and more broadly to behavioral and metabolic research involving  
324 the GM. Specific to the BTBR mouse, we have demonstrated that this model of ASD is  
325 susceptible to selective GM-dependent effects on the core ASD-related behaviors (particularly  
326 in males) and that body weight is influenced by the postnatal GM. The exact microbiome-  
327 mediated mechanisms driving these differences in behavior and growth in this model are yet to  
328 be determined, but complex microbial communities should be considered when using the BTBR

329 mouse. More broadly, this work emphasizes the need to incorporate complex communities into  
330 gut-brain-axis research as it adds to a growing body of literature demonstrating that variability  
331 within the host GM contributes to variability of host phenotypes.

332

333 **Methods**

334 **ETHICS STATEMENT**

335 This study was conducted in accordance with the recommendations set forth by the  
336 Guide for the Care and Use of Laboratory Animals and was approved by the University of  
337 Missouri Institutional Animal Care and Use Committee (MU IACUC protocol 36781).

338

339 **ANIMALS**

340 BTBR (RRID:IMSR\_JAX:002282) and C57BL/6J (RRID:IMSR\_JAX:000664) mice were  
341 purchased from The Jackson Laboratory (Bar Harbor, ME, USA). Mice were bred and pups  
342 were cross-fostered onto CD-1 surrogate dams within 24 hours of birth. The CD-1 surrogate  
343 dams were acquired from a colony of mice colonized with an Envigo-origin microbiome (GM<sub>High</sub>)  
344 maintained at the NIH-funded Mutant Mouse Resource & Research Center at the University of  
345 Missouri<sup>49</sup>. A successful transfer of GM<sub>High</sub> was confirmed using 16S rRNA amplicon sequencing  
346 of cross-fostered pups and GM<sub>High</sub>-donating dams. GM<sub>Low</sub> BTBR mice maintained their Jackson  
347 Laboratory-origin microbiome. Colonies of GM<sub>Low</sub> and GM<sub>High</sub> BTBR and B6 mice were then  
348 established. Mice used in the present study were from the 6<sup>th</sup> to 8<sup>th</sup> generation of their  
349 respective colonies.

350 Mice were group-housed under barrier conditions in microisolator cages (Thoren,  
351 Hazleton, PA, USA) on shaved aspen chip bedding with *ad libitum* access to autoclaved tap  
352 water and irradiated LabDiet 5053 chow (Labdiet, St. Louis, MO). Mice were maintained on a  
353 12:12 light/dark cycle.

354

355 **BODY WEIGHTS**

356 Neonatal body weights (D0 and D7) were collected using a tared New Classic MF  
357 #ML204 scale (Mettler Toledo; Columbus, OH, USA). Body weights at weaning (D21) and  
358 adulthood (D50) were measured using a Ranger<sup>TM</sup> 3000 (OHAUS; Parsippany, NJ, USA).



359

## 360 **MICROBIOME ANALYSIS**

### 361 *SAMPLE COLLECTION*

362 Fecal samples (1-2 pellets) were collected at necropsy from the distal colon of adult  
363 (D50) mice used in behavior testing and placed into 2 mL round-bottom tubes with a single 0.5  
364 cm metal bead. Samples were flash frozen in liquid nitrogen then stored at -80°C until  
365 processing. Fecal DNA was extracted using a modified PowerFecal Pro Kit (QIAGEN; Hilden,  
366 North-Rhine-Westphalia, Germany). Briefly, lysis buffer (Solution C1) was directly added to the  
367 sample tube with the metal bead rather than the sample tube provided by the kit. Samples were  
368 then homogenized using a TissueLyser II (QIAGEN; Hilden, North-Rhine-Westphalia, Germany)  
369 for 10 min at 30 Hz before resuming extraction as prescribed by the manufacturer. DNA was  
370 eluted using Solution C6.

371

### 372 *16S rRNA TARGETED-AMPLICON SEQUENCING*

373 Targeted-amplicon 16S rRNA library preparation and sequencing were performed by the  
374 University of Missouri Genomics Technology Core. Library preparations of the V4 region of the  
375 16S rRNA gene were generated using PCR-amplification with the universal primers  
376 (U515F/806R)<sup>50</sup> flanked by dual-index Illumina adapter sequences. PCR reactions each  
377 contained 100 ng metagenomic DNA, primers (0.2 μM each), dNTPs (200 μM each), and  
378 Phusion high-fidelity DNA polymerase (1U, Thermo Fisher, Waltham, MA, USA) in a 50 μL  
379 reaction. The amplification parameters were 98°C(3 min) + [98°C(15 s) + 50°C(30 s) + 72°C(30  
380 s)] × 25 cycles + 72°C(7 min). Libraries were combined, mixed, and purified using Axygen  
381 Axyprep MagPCR clean-up beads for 15 min at room temperature. The products were washed  
382 multiple times with 80% ethanol and the dried pellet was resuspended in 32.5 μL of EB buffer  
383 (Qiagen, Venlo, The Netherlands), incubated for two minutes at room temperature, and then  
384 placed on a magnetic stand for five minutes. The amplicon pool was evaluated using an

385 Advanced Analytical Fragment Analyzer automated electrophoresis system, quantified using  
386 quant-iT HS dsDNA reagent kits, and diluted according to the Illumina standard protocol for  
387 sequencing as 2 × 250 bp paired-end reads on the MiSeq instrument.

388

## 389 INFORMATICS

390 Sequences were processed using the Quantitative Insights into Molecular Ecology 2  
391 v2021.8<sup>51</sup>. Paired-end reads were trimmed of the universal primers and Illumina adapters using  
392 *cutadapt*<sup>52</sup>. Reads were then denoised into unique amplicon sequence variants (ASVs) using  
393 DADA2<sup>53</sup> with the following parameters: 1) reads were truncated to 150 bp in length, 2) reads  
394 with greater than 2 expected errors were discarded, 3) reads were merged with minimum  
395 overlap of 12 bp, and 4) chimeras were removed using the ‘consensus’ method. Unique  
396 sequences were filtered to between 249 and 257 bp in length. The remaining sequences were  
397 assigned a taxonomic classification using the *classify-sklearn* approach<sup>54</sup> with the SILVA 138  
398 99% NR reference database<sup>55</sup> trimmed to the U515F/806R universal primers<sup>50</sup>.

399 The feature table of ASV counts per sample was rarefied to 28,850 ASVs per sample.  
400 The rarefied table was used for the remaining microbiome analyses. Chao1 and Shannon  
401 Indices (alpha diversity) were determined using the *microbiome*<sup>56</sup> and *vegan*<sup>57,58</sup> libraries,  
402 respectively. Beta diversity was compared by first creating a distance matrix with Bray-Curtis  
403 distances using the *vegan* library<sup>57,58</sup>. Differences in microbial beta diversity were visualized with  
404 principal coordinate analyses (PCoA) of quarter-root transformed feature tables with a Calliez  
405 correction using the *ape* library<sup>59</sup>. Differentially abundant taxa were identified using ALDEx2<sup>26</sup>  
406 and ANCOM-BC2<sup>27</sup> with a Benjamin-Hochberg<sup>60</sup> corrected *p* value less than 0.05.

407

## 408 BEHAVIORAL ASSAYS

409 All behavior tests were performed in a dedicated behavior suite separate from the animal  
410 housing room. Light levels for adult and neonatal testing were maintained at ~5 *lux* and ~100

411 *lux*, respectively. Sound levels were maintained at ~45 dB during testing. Videos were captured  
412 using a DMK 22AUC03 IR camera (The Imaging Source; Charlotte, NC, USA) positioned 1.5 m  
413 above the cage bottom. Videos were recorded using ANY-maze v7.10 (ANY-maze; Wood Dale,  
414 IL, USA).

415

#### 416 *ULTRASONIC VOCALIZATION*

417 USVs were collected using separation-induced vocalizations at PND7<sup>21</sup>. Briefly, cages  
418 were transferred to a behavior suite and allowed to acclimate for 60 min prior to testing.  
419 Neonates were individually separated from the dam and placed onto the floor of a heated, clean  
420 mouse cage enclosed within an isolated environmental chamber (Omnitech Electronics, Inc.;  
421 Columbus, OH, USA). An UltraSoundGate CM16 ultrasonic-sensitive microphone (AviSoft;  
422 Glienicke, Brandenburg, Germany) was suspended 15 cm above the cage bottom. The cage  
423 was then closed within the environmental chamber and USVs were recorded for a 5 min period  
424 using RECORDER USGH (AviSoft; Glienicke, Brandenburg, Germany). To prevent testing the  
425 same animal multiple times, mice were marked with a permanent marker after completing the  
426 recording, then returned to their birth dam. The recording chamber was cleaned with 70% EtOH  
427 before the first recording and after each subsequent trial. Mice were tested in alternating order  
428 of GM and sex as appropriate.

429 USV recordings were stored as *wav* files and analyzed using the machine-learning  
430 based *VocalMat* (v2021, [github.com/ahof1704/VocalMat](https://github.com/ahof1704/VocalMat)) using default settings<sup>61</sup>. *VocalMat*  
431 classifies individual mouse USVs into one of 12 classes: short, flat, chevron, reverse chevron,  
432 downward frequency modulation, upward frequency modulation, complex, multi steps, two  
433 steps, step down, step up, and noise. Calls classified as noise were removed from the  
434 vocalization rate and repertoire analysis. The vocal repertoire was determined by calculating the  
435 relative abundance of each call class for each mouse.

436

437 *SELF-GROOMING TEST*

438 Five-week-old mice were acclimated to an isolated behavior suite for 60 min prior to  
439 testing. Mice were individually placed into a clean, autoclaved cage and allowed to habituate for  
440 10 min. Each mouse was then video recorded for the following 10 min<sup>20</sup>. A unique, randomly-  
441 generated identifier was placed within frame of each video, blinding the reviewer from strain,  
442 sex, and GM. Cages were cleaned prior to the first animal and after each trial using 70% EtOH.  
443 Each video was manually reviewed by a blinded reviewer. The total time spent grooming was  
444 measured using a stopwatch. Grooming behaviors included washing or scratching head, flank,  
445 limbs, and tail.

446

447 *MARBLE BURYING TEST*

448 Six-week-old mice were allowed to acclimate to an isolated behavior suite for 60 min  
449 prior to testing. Individual mice were placed in a standard Thoren mouse microisolator cage  
450 filled with 4-5 cm of aspen chip bedding and 12 black marbles placed in a 3 × 4 grid pattern on  
451 top of the bedding. Marbles were positioned prior to each trial using a template grid. Mice were  
452 placed into the cages and recorded for five minutes. A unique identifier was placed within frame  
453 of each video to blind the reviewer from strain, sex, and GM. Cages and marbles were cleaned  
454 prior to the first animal and after every trial using 70% EtOH. Fresh aspen chip bedding was  
455 provided for each trial. Videos were manually reviewed by a blinded reviewer using a stopwatch.  
456 Marble burying activity was defined as direct interaction with a marble or digging behavior.

457

458 *SOCIAL PREFERENCE TEST*

459 Seven-week-old mice were allowed to acclimate to an isolated behavior suite for 60 min  
460 prior to testing. Individual mice were placed into the center chamber of a three-chamber  
461 plexiglass arena (60 × 40 × 22 cm) and allowed to habituate to the arena for a 10 min period<sup>28</sup>.  
462 Following the acclimation period, the test mouse was enclosed in the middle chamber using

463 plexiglass panels, blocking access to the outermost chambers. The test mouse was allowed to  
464 enter the middle chamber on its own volition without interaction from the experimenter. One  
465 cylindrical plexiglass cage (10 × 18.5 cm, 1 cm openings between vertical bars) was then  
466 placed in each of the outermost chambers in opposing corners. An age- and sex- matched A/J  
467 mouse (RRID:IMSR\_JAX:000646, Jackson Laboratories; Bar Harbor, ME, USA) was placed in  
468 one of the cylinders (Stranger). A/J mice had been habituated to the cylinder during two 20 min  
469 training sessions, one on each side of the three-chamber arena. A plastic block was placed in  
470 the second cylinder (Object). The position of the stranger and object alternated between trials  
471 within each arena. The test mouse was then allowed to interact with the stranger or object for a  
472 period of 10 min. The position of the mouse and time spent in each zone was determined using  
473 ANY-maze. The three-chamber arena was cleaned with 70% EtOH prior to the first animal and  
474 after every subsequent test.

475

#### 476 *FOOD INTAKE*

477 Food intake was monitored using a modified protocol from Cheatham et al.<sup>13</sup>. Food  
478 intake was monitored for four consecutive days for six consecutive weeks beginning after  
479 weaning (3 weeks old). On the first day (D0), the food hopper was topped off with LabDiet 5053  
480 chow and the total hopper weight (hopper + chow) was measured using a OHAUS Ranger™  
481 3000. Individual mouse weights were also recorded using the same scale. For the next three  
482 days, the hopper and mice were weighed in the same manner. The difference in hopper weights  
483 between each day was normalized to the combined animal weight of that cage. Feed efficiency  
484 was determined by normalizing the average food consumption to the combined cage weight.

485 Body and food intake weights were averaged for each week.

486

#### 487 *RUNNING WHEEL*

488           Nine-week-old mice were housed in an animal room containing no other mice besides  
489 the animals undergoing wheel running evaluation. Mice were individually housed in Techniplast  
490 cages each containing a Low-Profile Wireless Running Wheel (Med Associates Inc.; Fairfax,  
491 VT, USA). Running wheels transmitted revolution counts to a central hub via Bluetooth.  
492 Locomotor activity was logged as revolutions per minute for one week using the Wheel Manager  
493 Data Acquisition Software from Med Associates. Total revolutions were converted to kilometers  
494 travelled using the prescribed conversion rate of  $(3.78 \times 10^{-4} \text{ km/revolution})$ .

495

#### 496 **FECAL ENERGY LOSS**

497           Fecal samples ( $799.1 \pm 254.5$  mg wet feces) were collected from seven-week-old mice  
498 over 2-3 morning collection periods. Fecal samples were dried at  $65^{\circ}\text{C}$  to a constant dry matter  
499 content. The gross energy (GE) of LabDiet 5053 chow and fecal samples was measured using  
500 a 6200 Isoperibol Calorimeter (Parr Instrument Co.; Moline, IL, USA). Benzoic acid ( $6318 \pm 14$   
501 kcal GE/kg; Parr Instrument Co.) was used as the calibration standard. Temperature changes  
502 during combustion were monitored via a thermocouple, and the heat of combustion ( $\Delta H$ ) was  
503 calculated using the calorimeter's specific heat capacity, then converted to caloric content  
504 (kcal/g feces). Accuracy corrections were applied to address background and ignition source  
505 heat.

506

#### 507 **STATISTICAL ANALYSES**

508           All statistical analyses were performed in R v 2021<sup>62</sup>. Differences in univariate data were  
509 assessed using two-way analysis of variance (ANOVA) with GM and sex as main effects.  
510 Longitudinal univariate data (i.e., food intake and physical activity) were assessed using three-  
511 way ANOVA tests with GM, sex, and time as main effects. *Post hoc* comparisons were made  
512 using a Tukey's HSD test. Differences in paired data (i.e., social preference test) were assessed

513 using paired T tests. All tests for significant differences in univariate data were performed using  
514 the *rstatix*<sup>63</sup> package.

515 Differences in multivariate data (i.e., microbiome composition and vocal repertoire) were  
516 assessed using a permutational analysis of variance (PERMANOVA) using the *adonis2* function  
517 within the *vegan*<sup>57,58</sup> library. Differentially abundant genera were identified using ALDEx2<sup>26</sup> and  
518 ANCOM-BC2<sup>27</sup>. Significantly enriched taxa were identified by both tools as having a Benjamini-  
519 Hochberg-corrected *p* value < 0.05<sup>64</sup>.

520

## 521 **Acknowledgements**

522 We would like to thank the Mutant Mouse Resource & Research Center at the University  
523 of Missouri (NIH U42 OD010918) for donating the surrogate GM<sub>High</sub> CD-1 dams. ZM, KG, ALR,  
524 and ACE were supported by NIH U42 OD010918. ZM was also supported by NIH T32  
525 GM008396.

526

## 527 **Disclosure Statement**

528 The authors report there are no competing interests to declare.

529

## 530 **Data availability statement**

531 All 16S rRNA sequencing data has been deposited to the National Center for  
532 Biotechnology Information (NCBI) Sequence Read Archive (SRA) under the BioProject number  
533 PRJNA1083497. All code has been deposited at [https://github.com/ericsson-lab/btbr\\_2024](https://github.com/ericsson-lab/btbr_2024).

534

## 535 **Figure Legends**

536 **Figure 1. Standardized complex microbiomes selectively affect male ASD-related**  
537 **behavior.**

- 538 (A) Graphical representation of experimental design depicting cohorts of neonatal ( $n = 10-12$   
539 mice/sex/GM) and adult ( $n = 20$  mice/sex/GM) BTBR mice.
- 540 (B) Dot plot depicting Chao-1 Index. \*\*\*  $p_{GM} < 0.001$ ,  $p_{Sex} = 0.002$ , Two-way ANOVA
- 541 (C) Dot plot depicting Shannon Index.  $p_{GM} = 0.867$ ,  $p_{Sex} = 0.276$ , Two-way ANOVA
- 542 (D) Principal coordinate analysis depicting Bray-Curtis dissimilarity between microbial  
543 communities.  $p_{GM} < 0.001$ ,  $p_{Sex} = 0.063$ , Two-way PERMANOVA.
- 544 (E) Dot plot depicting USV rate. \*  $p < 0.05$ , \*\*  $p < 0.01$ , Tukey *post hoc*.
- 545 (F) Principal coordinate analysis depicting Bray-Curtis dissimilarity of the relative abundance of  
546 ultrasonic vocalizations.  $p_{GM} = 0.001$ ,  $p_{Sex} = 0.044$ , Two-way PERMANOVA.
- 547 (G) Stacked bar charts depicting mean relative abundance of call types determined by  
548 VocalMat.
- 549 (H) Dot plot depicting Grooming Index.  $p_{GM} = 0.321$ ,  $p_{Sex} = 0.069$ , Two-way ANOVA.
- 550 (I) Dot plot depicting Burying Index.  $p_{GM} = 0.862$   $p_{Sex} = 0.048$ , Two-way ANOVA.
- 551 (J) Dot plot depicting time spent in Stranger (closed circles) or Object (open circles) chambers  
552 of social preference test.
- 553 (K) Tukey box plot depicting Social Preference Index. \*  $p_{GM} = 0.044$ ,  $p_{Sex} = 0.498$ , Two-way  
554 ANOVA.

555

556 **Figure S2. Standardized complex microbiomes selectively affect burying behavior of B6**  
557 **mice.**

- 558 (A) Dot plot depicting Grooming Index.  $p_{GM} = 0.698$ ,  $p_{Sex} = 0.838$ , Two-way ANOVA.
- 559 (B) Dot plot depicting Burying Index. \*\*  $p_{GM} = 0.004$ ,  $p_{Sex} = 0.224$ , Two-way ANOVA.
- 560 (C) Dot plot depicting time spent in Stranger (closed circles) or Object (open circles) chambers  
561 of social preference test. \*  $p = 0.027$ , Paired T test. Three-way ANOVA results are provided  
562 in inset.



563 (D) Tukey box plot depicting Social Preference Index.  $p_{GM} = 0.771$ ,  $p_{Sex} = 0.589$ , Two-way  
564 ANOVA.

565

566 **Figure 3. Standardized complex microbiomes may affect energy harvest in the gut.**

567 (A) Line plot depicting feed efficiency observed in GM<sub>Low</sub> and GM<sub>High</sub> BTBR mice. Bold line  
568 represents average feed efficiency. Ribbon represents standard deviation. Inset depicts  
569 three-way ANOVA results.

570 (B) Line plots depicting distance traveled by GM<sub>Low</sub> and GM<sub>High</sub> BTBR mice. Bold line represents  
571 average distance travelled. Ribbon represents standard deviation. Inset depicts three-way  
572 ANOVA results.

573 (C) Dot plot depicting time fecal energy as determined by bomb calorimetry.  $p_{GM} = 0.082$ ,  $p_{Sex} =$   
574  $0.093$ , Two-way ANOVA.

575

576 **Supplementary Figure Legends**

577 **Figure S1. Standardized complex microbiomes differ in beta diversity and taxonomic**  
578 **composition.** *Left:* Dendrogram depicting unsupervised hierarchical clustering of fecal  
579 microbiome samples based on composition. *Right:* Stacked bar chart depicting family-level  
580 abundance of dominant taxa (> 0.05%) in either GM.

581

582 **Figure S2. Standardized complex microbiomes selectively affect burying behavior of B6**  
583 **mice.**

584 (A) Dot plot depicting Grooming Index.  $p_{GM} = 0.698$ ,  $p_{Sex} = 0.838$ , Two-way ANOVA.

585 (B) Dot plot depicting Burying Index. \*\*  $p_{GM} = 0.004$ ,  $p_{Sex} = 0.224$ , Two-way ANOVA.

586 (C) Dot plot depicting time spent in Stranger (closed circles) or Object (open circles) chambers  
587 of social preference test. \*  $p = 0.027$ , Paired T test. Three-way ANOVA results are provided  
588 in inset.

589 (D) Tukey box plot depicting Social Preference Index.  $p_{GM} = 0.771$ ,  $p_{Sex} = 0.589$ , Two-way  
590 ANOVA.

591

592 **Figure S3. Standardized complex microbiomes affect body weight of B6 mice.** Dot plots  
593 depicting body weights at D21 (A), and D50 (B) in GM<sub>Low</sub> and GM<sub>High</sub> B6 mice. \*\*\*  $p_{GM} < 0.001$ ,  
594 Two-way ANOVA.

595

596 **Figure S4. Cross-fostering abrogates select GM-mediated effects on male ASD-related**  
597 **behavior.**

598 (A) Graphical representation of cross-fostering experimental design depicting cohorts of  
599 neonatal ( $n = 10-13$  mice/sex/GM) and adult (11-21 mice/sex/GM) BTBR mice. Inset depicts  
600 the GM that animals were exposed to pre- and postnatally.

601 (B) Dot plot depicting Chao-1 Index. \*\*\*  $p_{GM} = 0.001$ ,  $p_{Sex} = 0.401$ , Two-way ANOVA

602 (C) Dot plot depicting Shannon Index. \*  $p_{GM} = 0.013$ ,  $p_{Sex} = 0.545$ , Two-way ANOVA

603 (D) Principal coordinate analysis depicting Bray-Curtis dissimilarity between microbial  
604 communities.

605 (E) Dot plot depicting USV rate.  $p_{GM} = 0.387$ ,  $p_{Sex} = 0.306$ , Two-way ANOVA.

606 (F) Principal coordinate analysis depicting Bray-Curtis dissimilarity of the relative abundance of  
607 USVs.  $p_{GM} < 0.001$ ,  $p_{Sex} = 0.265$ , Two-way PERMANOVA.

608 (G) Stacked bar charts depicting mean relative abundance of call types determined by  
609 VocalMat.

610 (H) Dot plot depicting Grooming Index.  $p_{GM} = 0.237$ ,  $p_{Sex} = 0.015$ , Two-way ANOVA.

611 (I) Dot plot depicting Burying Index. \*  $p_{GM} = 0.049$ ,  $p_{Sex} = 0.474$ , Two-way ANOVA.

612 (J) Dot plot depicting time spent in Stranger (closed circles) or Object (open circles) chambers  
613 of social preference test.

614 (K) Tukey box plot depicting Social Preference Index.  $p_{GM} = 0.151$ ,  $p_{Sex} = 0.741$ , Two-way  
615 ANOVA.

616

617 **Figure S5. Standardized complex microbiomes were successfully transferred from**  
618 **surrogate dam to cross-fostered pup.** *Left:* Dendrogram depicting unsupervised hierarchical  
619 clustering of fecal microbiome samples based on composition in relation to surrogate dam.  
620 *Right.* Stacked bar chart depicting family-level abundance of dominant taxa (> 0.05%) in either  
621 GM.

622

623 **Figure S6. Standardized complex microbiomes affect body weight but not food intake.**

624 (A) Line plot depicting body weight observed in individual GM<sub>Low</sub> and GM<sub>High</sub> BTBR mice. Bold  
625 lines represent average body weight. Ribbon represents standard deviation. Inset depicts  
626 three-way ANOVA results.

627 (B) Line plot depicting food intake of cages of pair-housed GM<sub>Low</sub> and GM<sub>High</sub> BTBR mice. Bold  
628 line represents average food intake. Ribbon represents standard deviation. Inset depicts  
629 three-way ANOVA results.

630 (C) Dot plot depicting correlation between food intake of cage and body weight of mice within  
631 the same cage over the course of the experiment. Lines depict slope of correlation within  
632 either GM. Inset depicts correlation test results.

## 633 **References**

- 634 1. Hirota T, King BH. Autism Spectrum Disorder. *Jama* 2023; 329:157–68.
- 635 2. Maenner MJ, Warren Z, Williams AR, Amoakohene E, Bakian AV, Bilder DA, Durkin MS,  
636 Fitzgerald RT, Furnier SM, Hughes MM, et al. Prevalence and Characteristics of Autism  
637 Spectrum Disorder Among Children Aged 8 Years — Autism and Developmental Disabilities  
638 Monitoring Network, 11 Sites, United States, 2020. *Mmwr Surveill Summ* 2023; 72:1–14.
- 639 3. Hung LY, Margolis KG. Autism spectrum disorders and the gastrointestinal tract: insights into  
640 mechanisms and clinical relevance. *Nat Rev Gastroenterol Hepatol* 2023; :1–22.
- 641 4. Morais LH, Schreiber HL, Mazmanian SK. The gut microbiota–brain axis in behaviour and  
642 brain disorders. *Nat Rev Microbiol* 2021; 19:241–55.
- 643 5. Bermudez-Martin P, Becker JAJ, Caramello N, Fernandez SP, Costa-Campos R, Canaguier  
644 J, Barbosa S, Martinez-Gili L, Myridakis A, Dumas M-E, et al. The microbial metabolite p-Cresol  
645 induces autistic-like behaviors in mice by remodeling the gut microbiota. *Microbiome* 2021;  
646 9:157.
- 647 6. Cheng L, Wu H, Cai X, Zhang Y, Yu S, Hou Y, Yin Z, Yan Q, Wang Q, Sun T, et al. A Gpr35-  
648 tuned gut microbe-brain metabolic axis regulates depressive-like behavior. *Cell Host Microbe*  
649 2024; 32:227-243.e6.
- 650 7. Desbonnet L, Clarke G, Shanahan F, Dinan TG, Cryan JF. Microbiota is essential for social  
651 development in the mouse. *Mol Psychiatr* 2014; 19:146–8.
- 652 8. Sgritta M, Dooling SW, Buffington SA, Momin EN, Francis MB, Britton RA, Costa-Mattioli M.  
653 Mechanisms Underlying Microbial-Mediated Changes in Social Behavior in Mouse Models of  
654 Autism Spectrum Disorder. *Neuron* 2019; 101:246-259.e6.
- 655 9. Kim S, Kim H, Yim YS, Ha S, Atarashi K, Tan TG, Longman RS, Honda K, Littman DR, Choi  
656 GB, et al. Maternal gut bacteria promote neurodevelopmental abnormalities in mouse offspring.  
657 *Nature* 2017; 549:528–32.
- 658 10. Sharon G, Cruz NJ, Kang D-W, Gandal MJ, Wang B, Kim Y-M, Zink EM, Casey CP, Taylor  
659 BC, Lane CJ, et al. Human Gut Microbiota from Autism Spectrum Disorder Promote Behavioral  
660 Symptoms in Mice. *Cell* 2019; 177:1600-1618.e17.
- 661 11. Ericsson AC, Davis JW, Spollen W, Bivens N, Givan S, Hagan CE, McIntosh M, Franklin  
662 CL. Effects of Vendor and Genetic Background on the Composition of the Fecal Microbiota of  
663 Inbred Mice. *PLoS ONE* [Internet] 2015; 10:e0116704. Available from:  
664 <http://www.ncbi.nlm.nih.gov/pubmed/25675094>
- 665 12. Ericsson AC, Hart ML, Kwan J, Lanoue L, Bower LR, Araiza R, Lloyd KCK, Franklin CL.  
666 Supplier-origin mouse microbiomes significantly influence locomotor and anxiety-related  
667 behavior, body morphology, and metabolism. *Commun Biology* 2021; 4:716.

- 668 13. Cheatham CN, Gustafson KL, McAdams ZL, Turner GM, Dorfmeier RA, Ericsson AC.  
669 Standardized Complex Gut Microbiomes Influence Fetal Growth, Food Intake, and Adult Body  
670 Weight in Outbred Mice. *Microorganisms* 2023; 11:484.
- 671 14. Hart ML, Ericsson AC, Franklin CL. Differing Complex Microbiota Alter Disease Severity of  
672 the IL-10<sup>-/-</sup> Mouse Model of Inflammatory Bowel Disease. *Front Microbiol* 2017; 8:792.
- 673 15. Guo Y, Wang Q, Li D, Onyema OO, Mei Z, Manafi A, Banerjee A, Mahgoub B, Stoler MH,  
674 Barker TH, et al. Vendor-specific microbiome controls both acute and chronic murine lung  
675 allograft rejection by altering CD4<sup>+</sup>Foxp3<sup>+</sup> regulatory T cell levels. *Am J Transplant [Internet]*  
676 2019; 19:2705–18. Available from: <https://www.ncbi.nlm.nih.gov/pubmed/31278849>
- 677 16. Moskowitz JE, Doran AG, Lei Z, Busi SB, Hart ML, Franklin CL, Sumner LW, Keane TM,  
678 Amos-Landgraf JM. Integration of genomics, metagenomics, and metabolomics to identify  
679 interplay between susceptibility alleles and microbiota in adenoma initiation. *BMC Cancer* 2020;  
680 20:600.
- 681 17. Kim E, Paik D, Ramirez RN, Biggs DG, Park Y, Kwon H-K, Choi GB, Huh JR. Maternal gut  
682 bacteria drive intestinal inflammation in offspring with neurodevelopmental disorders by altering  
683 the chromatin landscape of CD4<sup>+</sup> T cells. *Immunity* 2021;
- 684 18. Choi GB, Yim YS, Wong H, Kim S, Kim H, Kim SV, Hoeffler CA, Littman DR, Huh JR. The  
685 maternal interleukin-17a pathway in mice promotes autism-like phenotypes in offspring. *Science*  
686 2016; 351:933–9.
- 687 19. Moy SS, Nadler JJ, Young NB, Perez A, Holloway LP, Barbaro RP, Barbaro JR, Wilson LM,  
688 Threadgill DW, Lauder JM, et al. Mouse behavioral tasks relevant to autism: Phenotypes of 10  
689 inbred strains. *Behav Brain Res* 2007; 176:4–20.
- 690 20. McFarlane HG, Kusek GK, Yang M, Phoenix JL, Bolivar VJ, Crawley JN. Autism-like  
691 behavioral phenotypes in BTBR T+tf/J mice. *Genes Brain Behav* 2008; 7:152–63.
- 692 21. Scattoni ML, Gandhi SU, Ricceri L, Crawley JN. Unusual Repertoire of Vocalizations in the  
693 BTBR T+tf/J Mouse Model of Autism. *Plos One* 2008; 3:e3067.
- 694 22. Moy SS, Nadler JJ, Young NB, Nonneman RJ, Segall SK, Andrade GM, Crawley JN,  
695 Magnuson TR. Social approach and repetitive behavior in eleven inbred mouse strains. *Behav*  
696 *Brain Res* 2008; 191:118–29.
- 697 23. Wöhr M, Roullet FI, Crawley JN. Reduced scent marking and ultrasonic vocalizations in the  
698 BTBR T+tf/J mouse model of autism. *Genes Brain Behav* 2011; 10:35–43.
- 699 24. Coretti L, Cristiano C, Florio E, Scala G, Lama A, Keller S, Cuomo M, Russo R, Pero R,  
700 Paciello O, et al. Sex-related alterations of gut microbiota composition in the BTBR mouse  
701 model of autism spectrum disorder. *Sci Rep-uk* 2017; 7:45356.
- 702 25. Golubeva AV, Joyce SA, Moloney G, Burokas A, Sherwin E, Arboleya S, Flynn I,  
703 Khochanskiy D, Moya-Pérez A, Peterson V, et al. Microbiota-related Changes in Bile Acid &

- 704 Tryptophan Metabolism are Associated with Gastrointestinal Dysfunction in a Mouse Model of  
705 Autism. *EBioMedicine* 2017; 24:166–78.
- 706 26. Fernandes AD, Reid JN, Macklaim JM, McMurrough TA, Edgell DR, Gloor GB. Unifying the  
707 analysis of high-throughput sequencing datasets: characterizing RNA-seq, 16S rRNA gene  
708 sequencing and selective growth experiments by compositional data analysis. *Microbiome*  
709 2014; 2:15–15.
- 710 27. Lin H, Peddada SD. Analysis of compositions of microbiomes with bias correction. *Nature*  
711 *communications* [Internet] 2020; 11:3514. Available from:  
712 <https://www.ncbi.nlm.nih.gov/pubmed/32665548>
- 713 28. Rein B, Ma K, Yan Z. A standardized social preference protocol for measuring social deficits  
714 in mouse models of autism. *Nat Protoc* 2020; 15:3464–77.
- 715 29. Daft JG, Ptacek T, Kumar R, Morrow C, Lorenz RG. Cross-fostering immediately after birth  
716 induces a permanent microbiota shift that is shaped by the nursing mother. *Microbiome* 2015;  
717 3:17.
- 718 30. Yang M, Zhodzishsky V, Crawley JN. Social deficits in BTBR T + tf/J mice are unchanged by  
719 cross-fostering with C57BL/6J mothers. *Int J Dev Neurosci* 2007; 25:515–21.
- 720 31. Zhang Y, Gao D, Kluetzman K, Mendoza A, Bolivar VJ, Reilly A, Jolly JK, Lawrence DA.  
721 The maternal autoimmune environment affects the social behavior of offspring. *J Neuroimmunol*  
722 2013; 258:51–60.
- 723 32. Caruso A, Ricceri L, Scattoni ML. Ultrasonic vocalizations as a fundamental tool for early  
724 and adult behavioral phenotyping of Autism Spectrum Disorder rodent models. *Neurosci*  
725 *Biobehav Rev* 2020; 116:31–43.
- 726 33. Peñagarikano O, Abrahams BS, Herman EI, Winden KD, Gdalyahu A, Dong H, Sonnenblick  
727 LI, Gruver R, Almajano J, Bragin A, et al. Absence of CNTNAP2 Leads to Epilepsy, Neuronal  
728 Migration Abnormalities, and Core Autism-Related Deficits. *Cell* 2011; 147:235–46.
- 729 34. Zhang Y, Li N, Li C, Zhang Z, Teng H, Wang Y, Zhao T, Shi L, Zhang K, Xia K, et al.  
730 Genetic evidence of gender difference in autism spectrum disorder supports the female-  
731 protective effect. *Transl Psychiatry* 2020; 10:4.
- 732 35. Willsey HR, Exner CRT, Xu Y, Everitt A, Sun N, Wang B, Dea J, Schmunk G, Zaltsman Y,  
733 Teerikorpi N, et al. Parallel in vivo analysis of large-effect autism genes implicates cortical  
734 neurogenesis and estrogen in risk and resilience. *Neuron* 2021; 109:788-804.e8.
- 735 36. Wang S, Wang B, Drury V, Drake S, Sun N, Alkhalil H, Arbelaez J, Duhn C, Genetics)  
736 TICG (TIC, Bromberg Y, et al. Rare X-linked variants carry predominantly male risk in autism,  
737 Tourette syndrome, and ADHD. *Nat Commun* 2023; 14:8077.
- 738 37. Vuong HE, Pronovost GN, Williams DW, Coley EJJ, Siegler EL, Qiu A, Kazantsev M, Wilson  
739 CJ, Rendon T, Hsiao EY. The maternal microbiome modulates fetal neurodevelopment in mice.  
740 *Nature* 2020; 586:281–6.

- 741 38. Pronovost GN, Yu KB, Coley-O'Rourke E JL, Telang SS, Chen AS, Vuong HE, Williams DW,  
742 Chandra A, Rendon TK, Paramo J, et al. The maternal microbiome promotes placental  
743 development in mice. *Sci Adv* 2023; 9:eadk1887.
- 744 39. Flowers JB, Oler AT, Nadler ST, Choi Y, Schueler KL, Yandell BS, Kendzierski CM, Attie  
745 AD. Abdominal obesity in BTBR male mice is associated with peripheral but not hepatic insulin  
746 resistance. *Am J Physiol-Endocrinol Metab* 2007; 292:E936–45.
- 747 40. Queen NJ, Bates R, Huang W, Xiao R, Appana B, Cao L. Visceral adipose tissue-directed  
748 FGF21 gene therapy improves metabolic and immune health in BTBR mice. *Mol Ther - Methods*  
749 *Clin Dev* 2021; 20:409–22.
- 750 41. Takeuchi T, Kubota T, Nakanishi Y, Tsugawa H, Suda W, Kwon AT-J, Yazaki J, Ikeda K,  
751 Nemoto S, Mochizuki Y, et al. Gut microbial carbohydrate metabolism contributes to insulin  
752 resistance. *Nature* 2023; 621:389–95.
- 753 42. Zalewska A. Developmental milestones in neonatal and juvenile C57Bl/6 mouse –  
754 Indications for the design of juvenile toxicity studies. *Reprod Toxicol* 2019; 88:91–128.
- 755 43. Sanidad KZ, Zeng MY. Neonatal gut microbiome and immunity. *Curr Opin Microbiol* 2020;  
756 56:30–7.
- 757 44. Russell AL, McAdams ZL, Donovan E, Seilhamer N, Siegrist M, Franklin CL, Ericsson AC.  
758 The contribution of maternal oral, vaginal, and gut microbiota to the developing offspring gut. *Sci*  
759 *Rep* 2023; 13:13660.
- 760 45. Oliphant K, Allen-Vercoe E. Macronutrient metabolism by the human gut microbiome: major  
761 fermentation by-products and their impact on host health. *Microbiome* 2019; 7:91.
- 762 46. Zeng X, Xing X, Gupta M, Keber FC, Lopez JG, Lee Y-CJ, Roichman A, Wang L, Neinast  
763 MD, Donia MS, et al. Gut bacterial nutrient preferences quantified in vivo. *Cell* 2022; 185:3441-  
764 3456.e19.
- 765 47. Xie C, Huang W, Young RL, Jones KL, Horowitz M, Rayner CK, Wu T. Role of Bile Acids in  
766 the Regulation of Food Intake, and Their Dysregulation in Metabolic Disease. *Nutrients* 2021;  
767 13:1104.
- 768 48. Ruigrok RAAA, Weersma RK, Vila AV. The emerging role of the small intestinal microbiota  
769 in human health and disease. *Gut Microbes* 2023; 15:2201155.
- 770 49. Hart ML, Ericsson AC, Lloyd KCK, Grimsrud KN, Rogala AR, Godfrey VL, Nielsen JN,  
771 Franklin CL. Development of outbred CD1 mouse colonies with distinct standardized gut  
772 microbiota profiles for use in complex microbiota targeted studies. *Sci Rep* 2018; 8:10107.
- 773 50. Caporaso JG, Lauber CL, Walters WA, Berg-Lyons D, Lozupone CA, Turnbaugh PJ, Fierer  
774 N, Knight R. Global patterns of 16S rRNA diversity at a depth of millions of sequences per  
775 sample. *Proc Natl Acad Sci [Internet]* 2011; 108:4516–22. Available from:  
776 <http://www.ncbi.nlm.nih.gov/pubmed/20534432>

- 777 51. Bolyen E, Rideout JR, Dillon MR, Bokulich NA, Abnet CC, Al-Ghalith GA, Alexander H, Alm  
778 EJ, Arumugam M, Asnicar F, et al. Reproducible, interactive, scalable and extensible  
779 microbiome data science using QIIME 2. *Nat Biotechnol* [Internet] 2019; 37:852–7. Available  
780 from: <https://www.ncbi.nlm.nih.gov/pubmed/31341288>
- 781 52. Martin M. Cutadapt removes adapter sequences from high-throughput sequencing reads.  
782 *EMBnetJ* [Internet] 2011; 17:10–2. Available from:  
783 <https://journal.embnet.org/index.php/embnetjournal/article/view/200>
- 784 53. Callahan BJ, McMurdie PJ, Rosen MJ, Han AW, Johnson AJ, Holmes SP. DADA2: High-  
785 resolution sample inference from Illumina amplicon data. *Nature methods* [Internet] 2016;  
786 13:581–3. Available from: <https://www.ncbi.nlm.nih.gov/pubmed/27214047>
- 787 54. Kaehler BD, Bokulich NA, McDonald D, Knight R, Caporaso JG, Huttley GA. Species  
788 abundance information improves sequence taxonomy classification accuracy. *Nat Commun*  
789 2019; 10:4643.
- 790 55. Pruesse E, Quast C, Knittel K, Fuchs BM, Ludwig W, Peplies J, Glockner FO. SILVA: a  
791 comprehensive online resource for quality checked and aligned ribosomal RNA sequence data  
792 compatible with ARB. *Nucleic Acids Res* [Internet] 2007; 35:7188–96. Available from:  
793 <https://www.ncbi.nlm.nih.gov/pubmed/17947321>
- 794 56. Lahti L, Shetty S. microbiome R package. 2012; Available from:  
795 <https://microbiome.github.io/microbiome/>
- 796 57. Dixon P. VEGAN, a package of R functions for community ecology. *J Veg Sci* 2003; 14:927–  
797 30.
- 798 58. Oksanen J, Blanchet FG, Kindt R, Legendre P, Minchin PR, O’Hara RB, Simpson GL,  
799 Solymos P, Stevens MHH, Wagner H. Vegan: Community Ecology Package. R package version  
800 2.2-0. 2014; Available from: <https://github.com/vegandevs/vegan>
- 801 59. Paradis E, Schliep K. ape 5.0: an environment for modern phylogenetics and evolutionary  
802 analyses in R. *Bioinformatics* [Internet] 2019; 35:526–8. Available from:  
803 <https://academic.oup.com/bioinformatics/article/35/3/526/5055127>
- 804 60. Y HYB. Controlling the false discovery rate: a practical and powerful approach to multiple  
805 testing. *Journal of the Royal Statistical Society Series B* 1995; 57:289–300.
- 806 61. Fonseca AH, Santana GM, Ortiz GMB, Bampi S, Dietrich MO. Analysis of ultrasonic  
807 vocalizations from mice using computer vision and machine learning. *eLife* 2021; 10:e59161.
- 808 62. Team RDC. R: A Language and Environment for Statistical Computing. 2022; Available  
809 from: <http://www.R-project.org>
- 810 63. Kassambara A. rstatix: Pipe-Friendly Framework for Basic Statistical Tests. 2022; Available  
811 from: <https://CRAN.R-project.org/package=rstatix>



812 64. Benjamini Y, Hochberg Y. Controlling the False Discovery Rate: A Practical and Powerful  
813 Approach to Multiple Testing. J Royal Statistical Soc Ser B Methodol [Internet] 1995; 57:289–  
814 300. Available from: <https://rss.onlinelibrary.wiley.com/doi/10.1111/j.2517-6161.1995.tb02031.x>

815

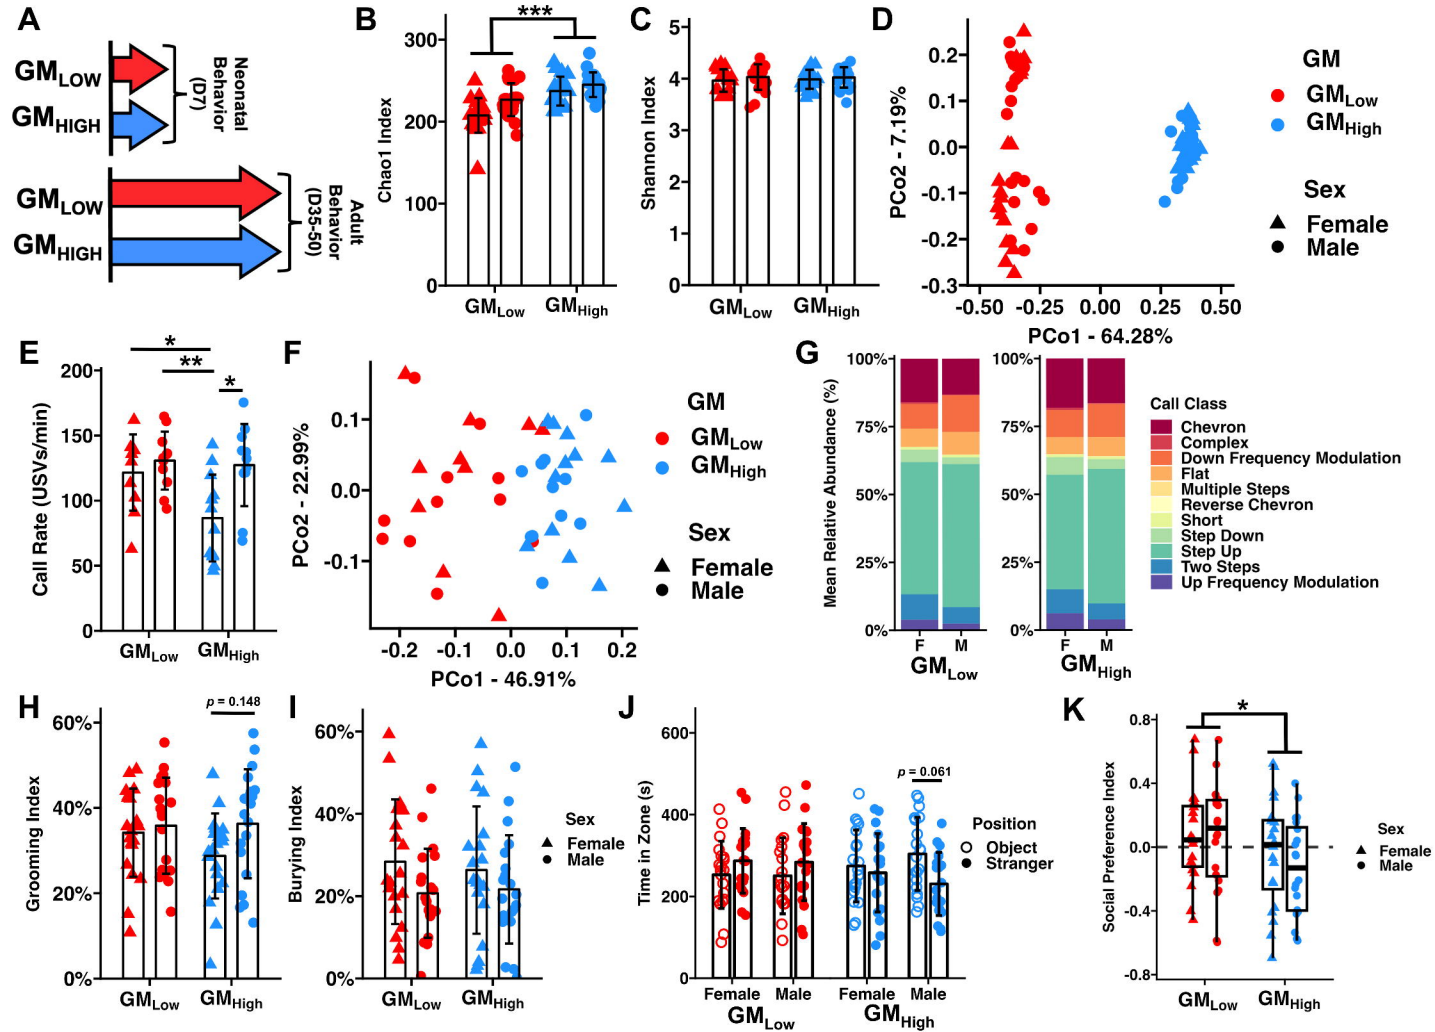

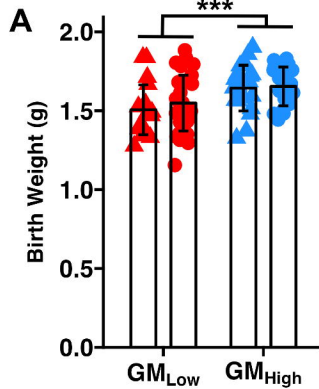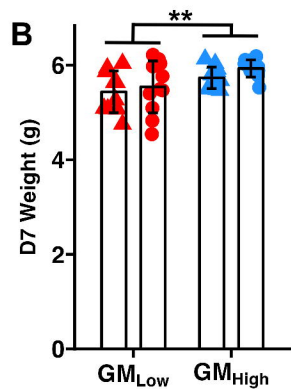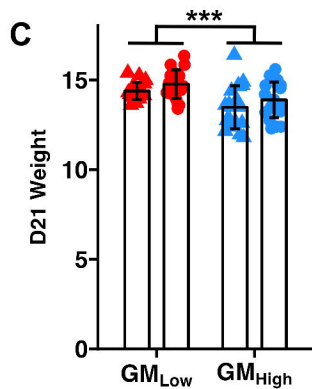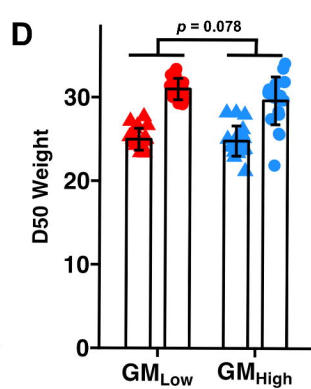

Sex  
 ▲ Female  
 ● Male

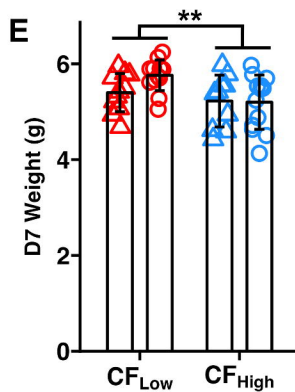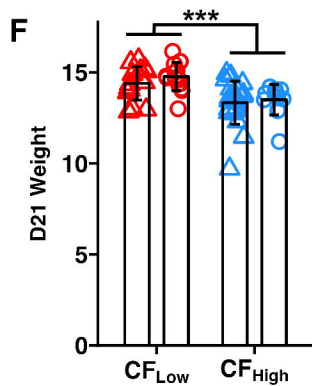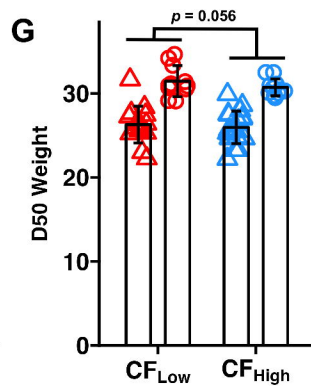

Sex  
 △ Female  
 ○ Male

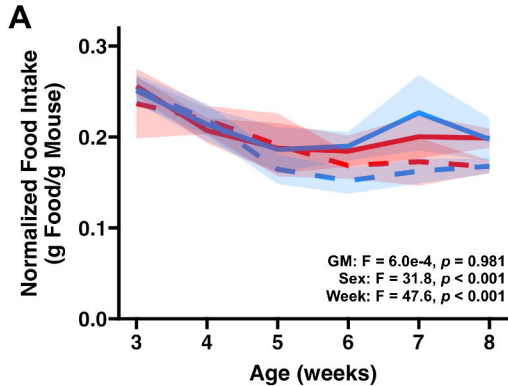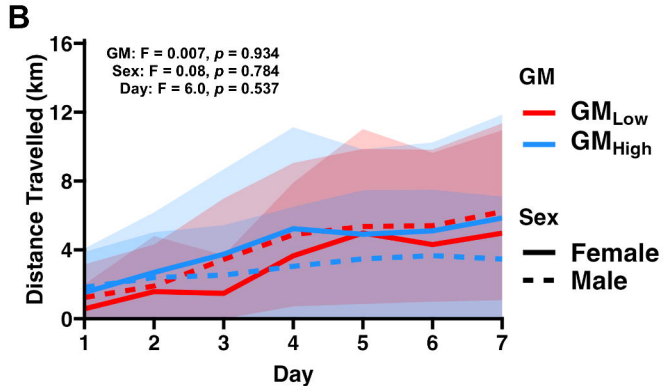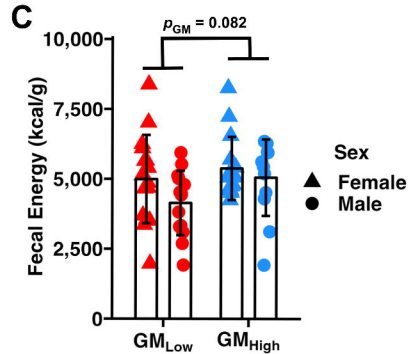

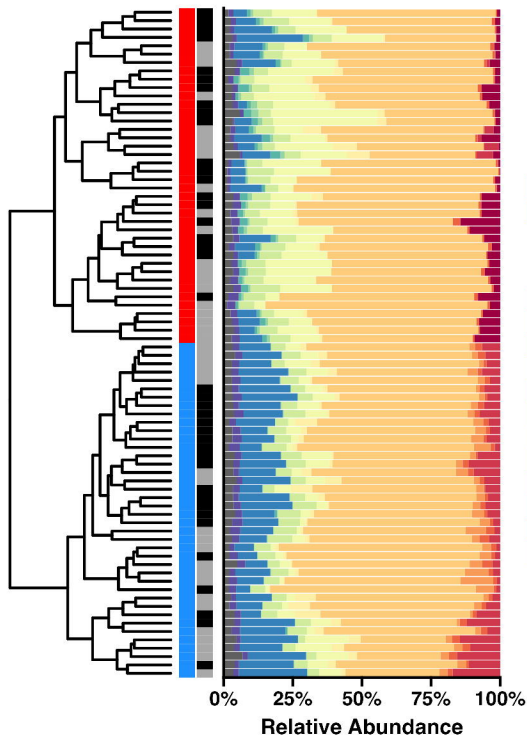

GM

■ GM<sub>Low</sub>

■ GM<sub>High</sub>

Sex

■ Female

■ Male

Family

■ Acholeplasmataceae

■ Bacteroidaceae

■ Clostridia vadinBB60 group

■ Deferribacteraceae

■ Lachnospiraceae

■ Lactobacillaceae

■ Muribaculaceae

■ Oscillospiraceae

■ Peptococcaceae

■ RF39

■ Rikenellaceae

■ Ruminococcaceae

■ Other

**A**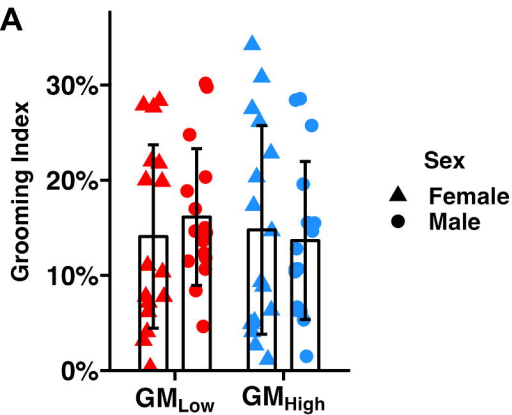**B**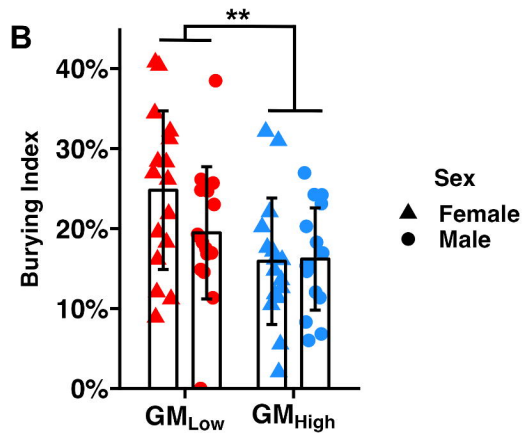**C**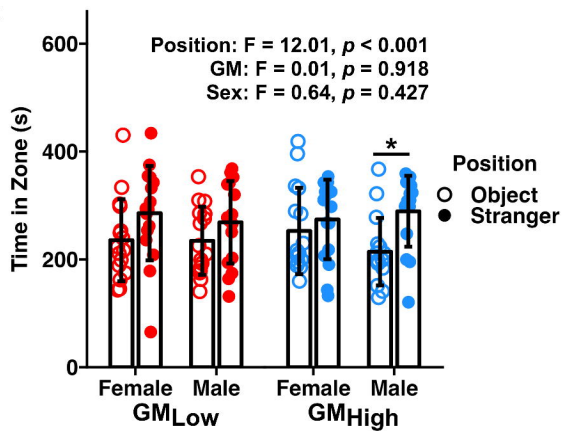**D**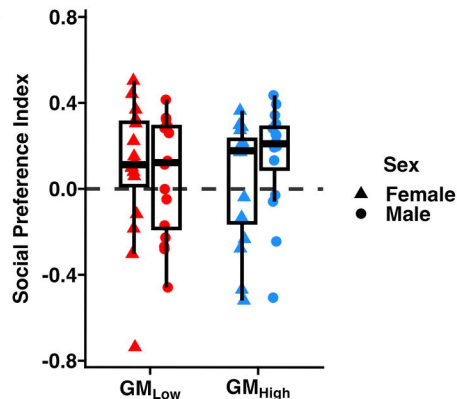

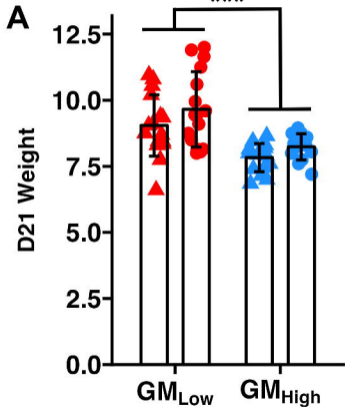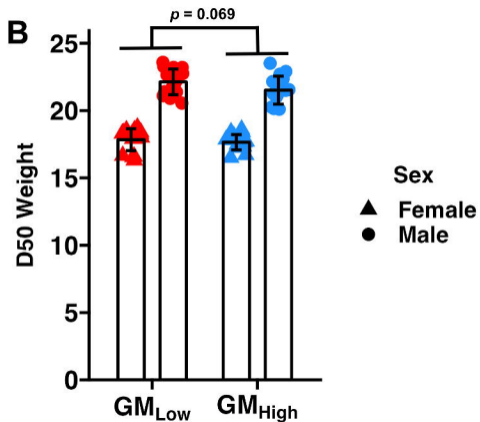

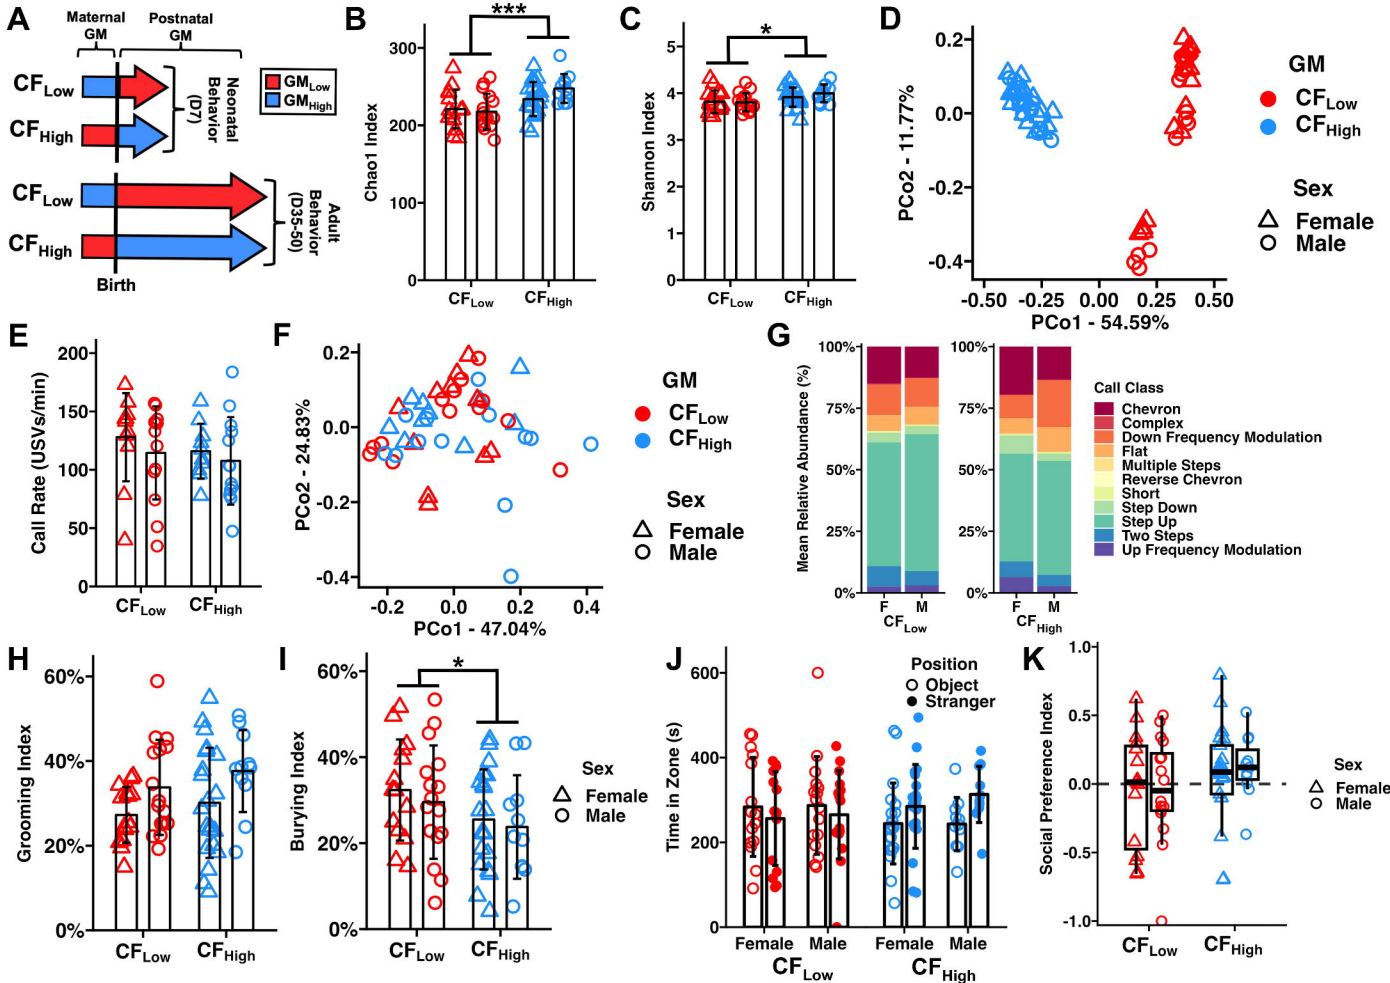



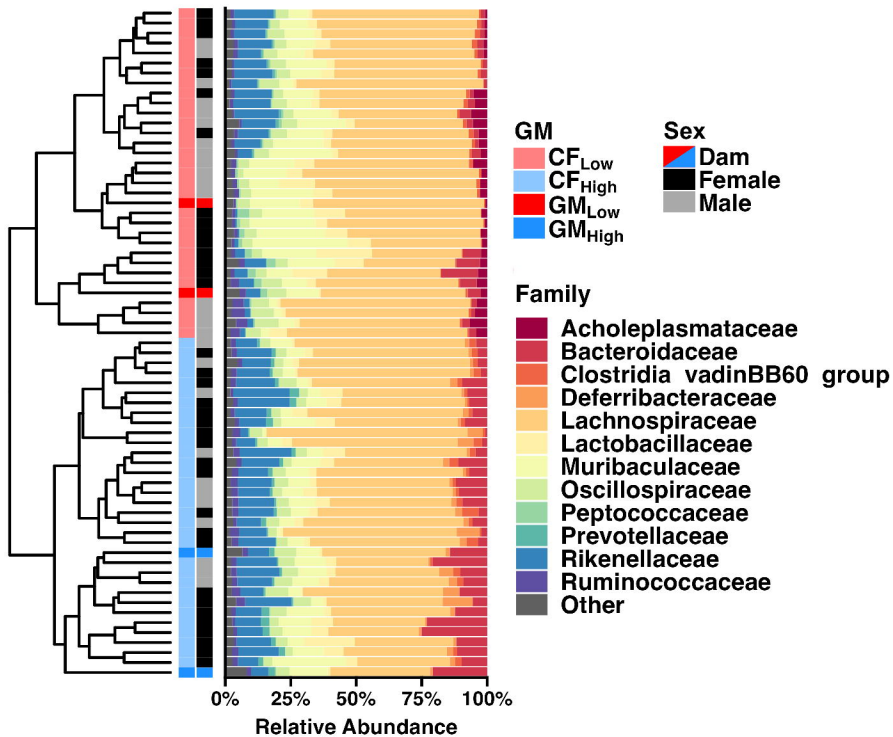

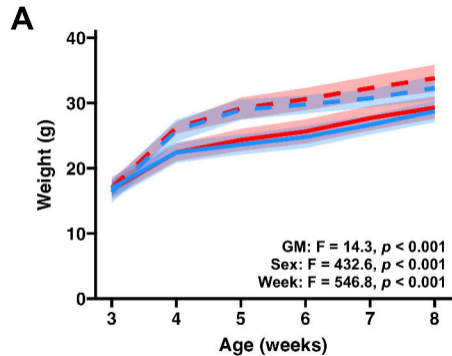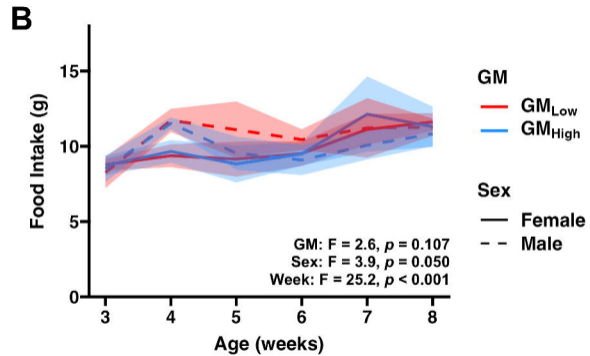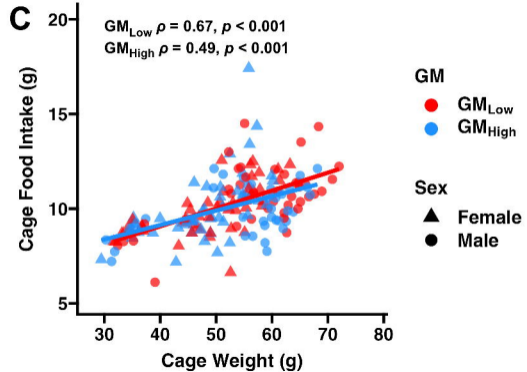

Source: https://www.biorxiv.org/content/biorxiv/early/2024/04/02/2024.04.01.587648.full.pdf?%3Fcollection=
